# Supplementary material for: Differential requirement of kindlin-3 for T cell progenitor homing to the non-vascularized and vascularized thymus
Source: eLife journal article supplement (doi:10.7554/elife.35816), 2018-09-05
Supplement: figures [file elife-35816-figures-v3.pdf]

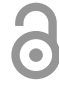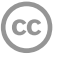

---

## Figures and figure supplements

Differential requirement of kindlin-3 for T cell progenitor homing to the non-vascularized and vascularized thymus

**Federico Andrea Moretti et al**

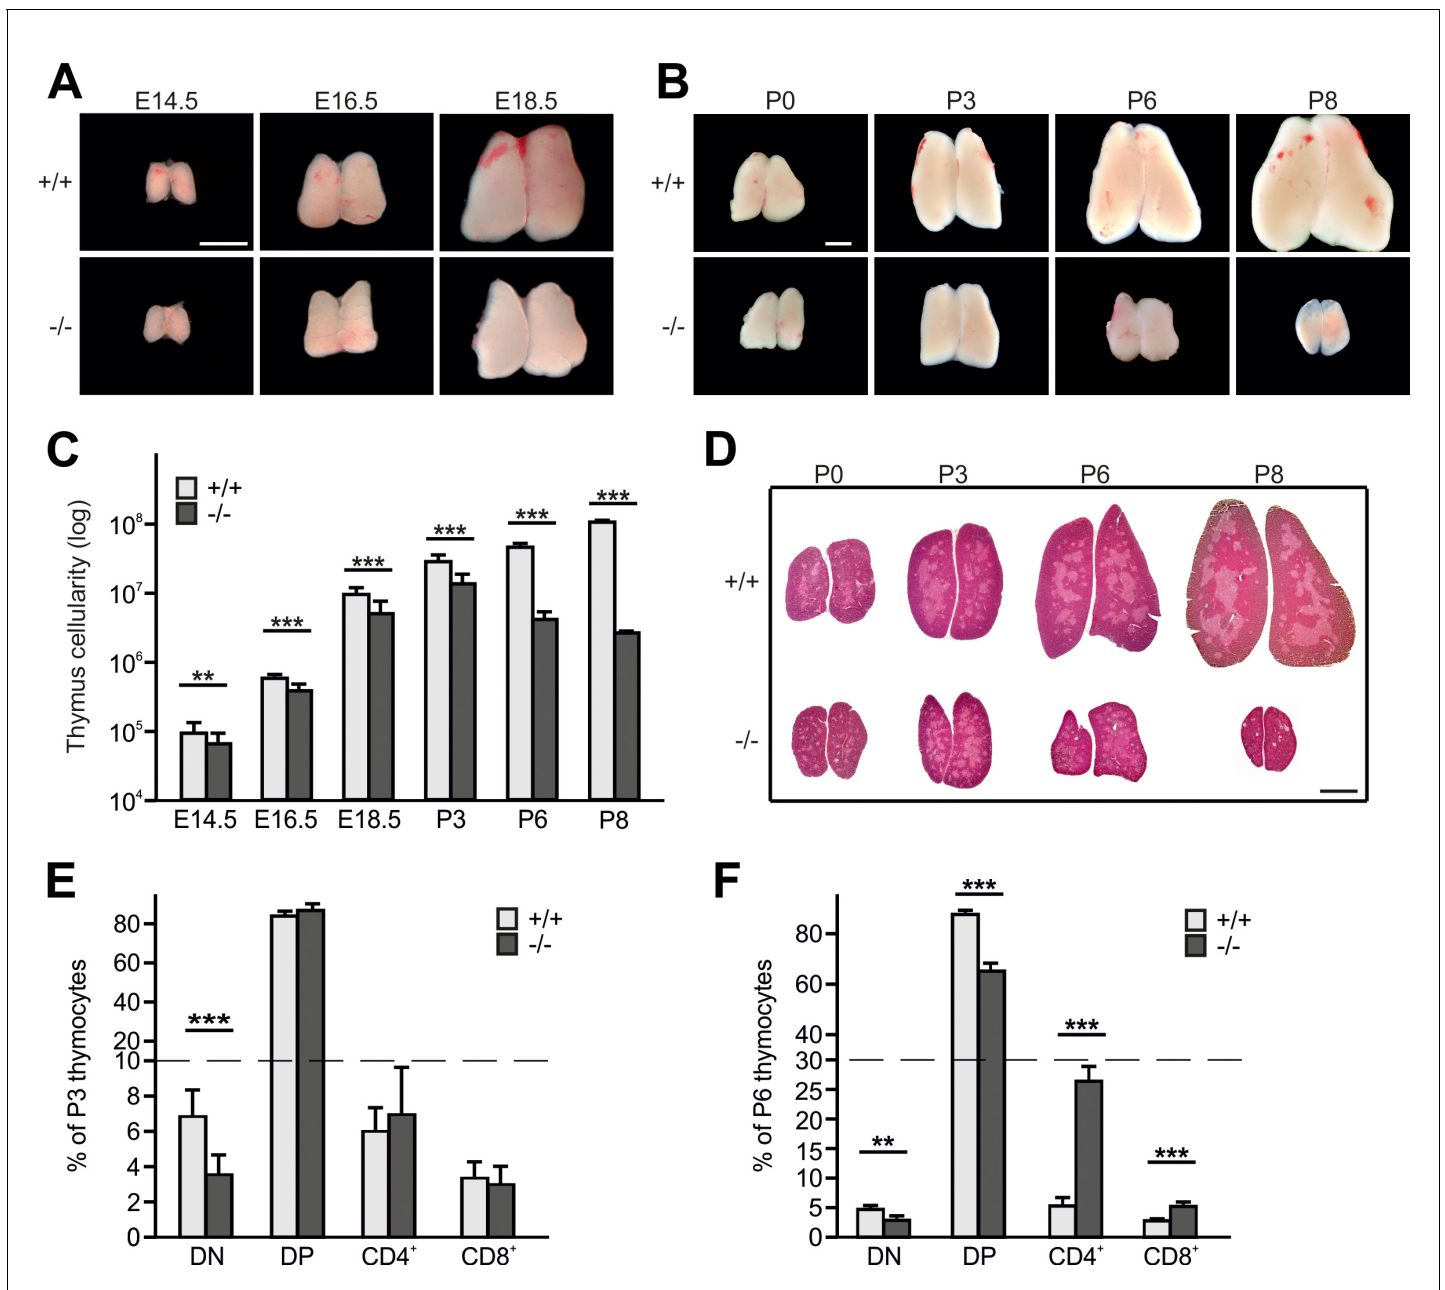

**Figure 1.** Kindlin-3 deficiency causes thymus atrophy. (A and B) Images from *Fermt3*<sup>+/+</sup> (upper panel) and *Fermt3*<sup>-/-</sup> (lower panel) thymi isolated at the indicated embryonic and postnatal stages. Scale bars 1 mm. (C) Total thymocyte numbers at indicated time points (E14.5 to P8). N(E14.5)=28/28; N(E16.5)=12/12; N(E18.5)=30/21; N(P3)=6/4; N(P6)=3/2. (D) Haematoxylin and Eosin staining of paraffin-embedded thymus sections. Scale bar 1 mm. (E and F) Frequencies of CD4 and CD8 double negative (DN), double positive (DP) and single positive CD4 and CD8 thymocytes isolated from P3 and P6 thymi. N(P3)=16/18; N(P6)=8/4. Bars indicate means  $\pm$  standard errors. \*\*p<0.01; \*\*\*p<0.001. See also **Figure 1—figure supplement 1**.

DOI: <https://doi.org/10.7554/eLife.35816.002>

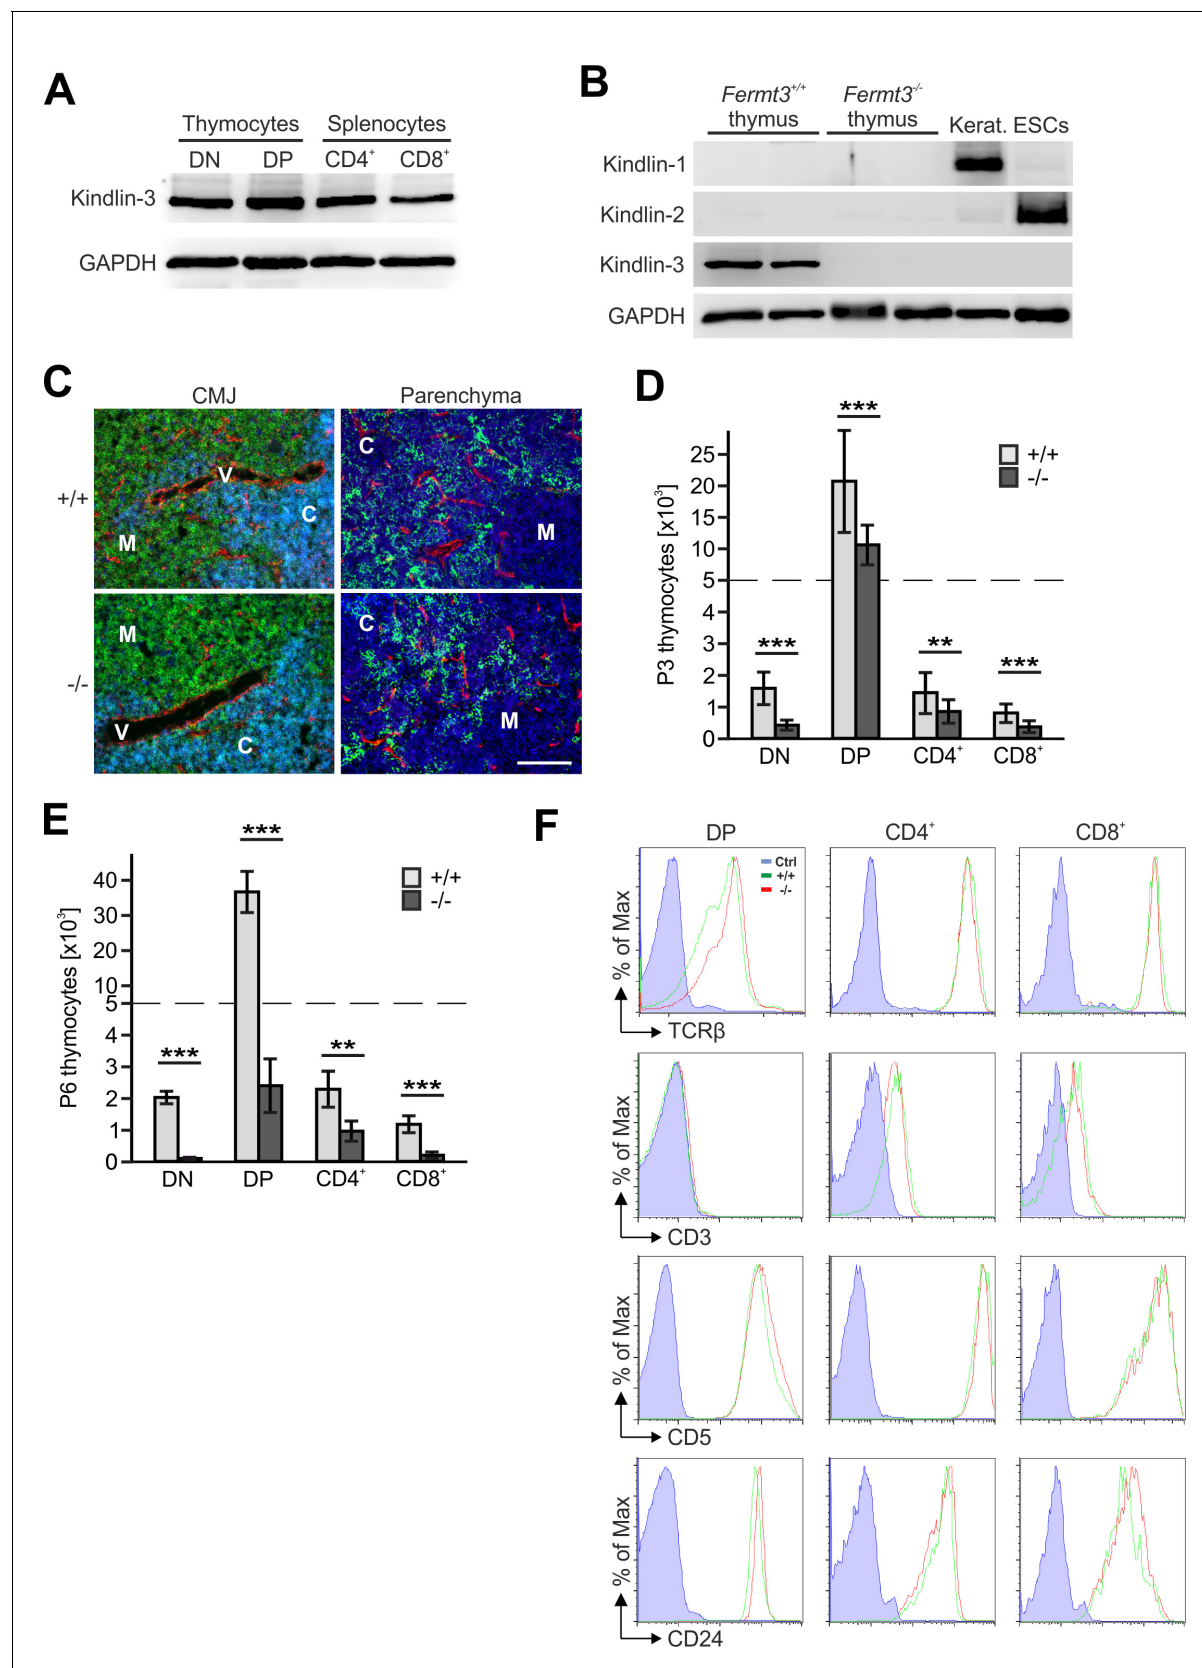

**Figure 1—figure supplement 1.** Kindlin-3 deficiency causes thymus atrophy. (A) Kindlin-3 expression in protein lysates from FACS sorted CD4/CD8 double negative (DN), CD4/CD8 double positive (DP), CD4 and CD8 single positive thymocytes. GAPDH served as loading control. (B) Expression of Kindlin-1, 2, 3 and GAPDH in thymus and ESCs. (C) Immunofluorescence of thymus sections. (D) Bar graph of P3 thymocytes. (E) Bar graph of P6 thymocytes. (F) Flow cytometry histograms. Figure 1—figure supplement 1 continued on next page

## Figure 1—figure supplement 1 continued

kindlin-1, -2 and -3 in protein lysates of *Fermt3*<sup>+/+</sup> and *Fermt3*<sup>-/-</sup> thymi. Keratinocyte and embryonic stem cell (ESC) lysates were used as positive controls for kindlin-1 and -2 expression, respectively. GAPDH was used as loading control. (C) Cryosections of P3 *Fermt3*<sup>+/+</sup> and *Fermt3*<sup>-/-</sup> thymi were stained with anti-pan-laminin (red), anti-CD4 (green) and anti-CD8 (blue) antibodies (left panel), or with anti-pan-cytokeratin (green), anti-PECAM-1 (red) antibodies and DAPI (blue) (right panel). Cells in cyan indicate CD4/CD8 double positive cells. M, medulla; C, cortex; V, vessel; CMJ, cortico-medullary junction. Scale bar 100  $\mu$ m. Absolute numbers of DN, DP, CD4<sup>+</sup> and CD8<sup>+</sup> thymocytes present in P3 (D) and P6 (E) thymi. (F) Expression of TCR $\beta$ , CD3, CD5 and CD24 on DP, CD4<sup>+</sup> and CD8<sup>+</sup> thymocytes from P3 *Fermt3*<sup>+/+</sup> and *Fermt3*<sup>-/-</sup> thymi analysed by flow cytometry. Isotype matched controls (blue); *Fermt3*<sup>+/+</sup> cells (green); *Fermt3*<sup>-/-</sup> cells (red). Bars indicate means  $\pm$  standard errors. \*\*p<0.01; \*\*\*p<0.001.

DOI: <https://doi.org/10.7554/eLife.35816.003>



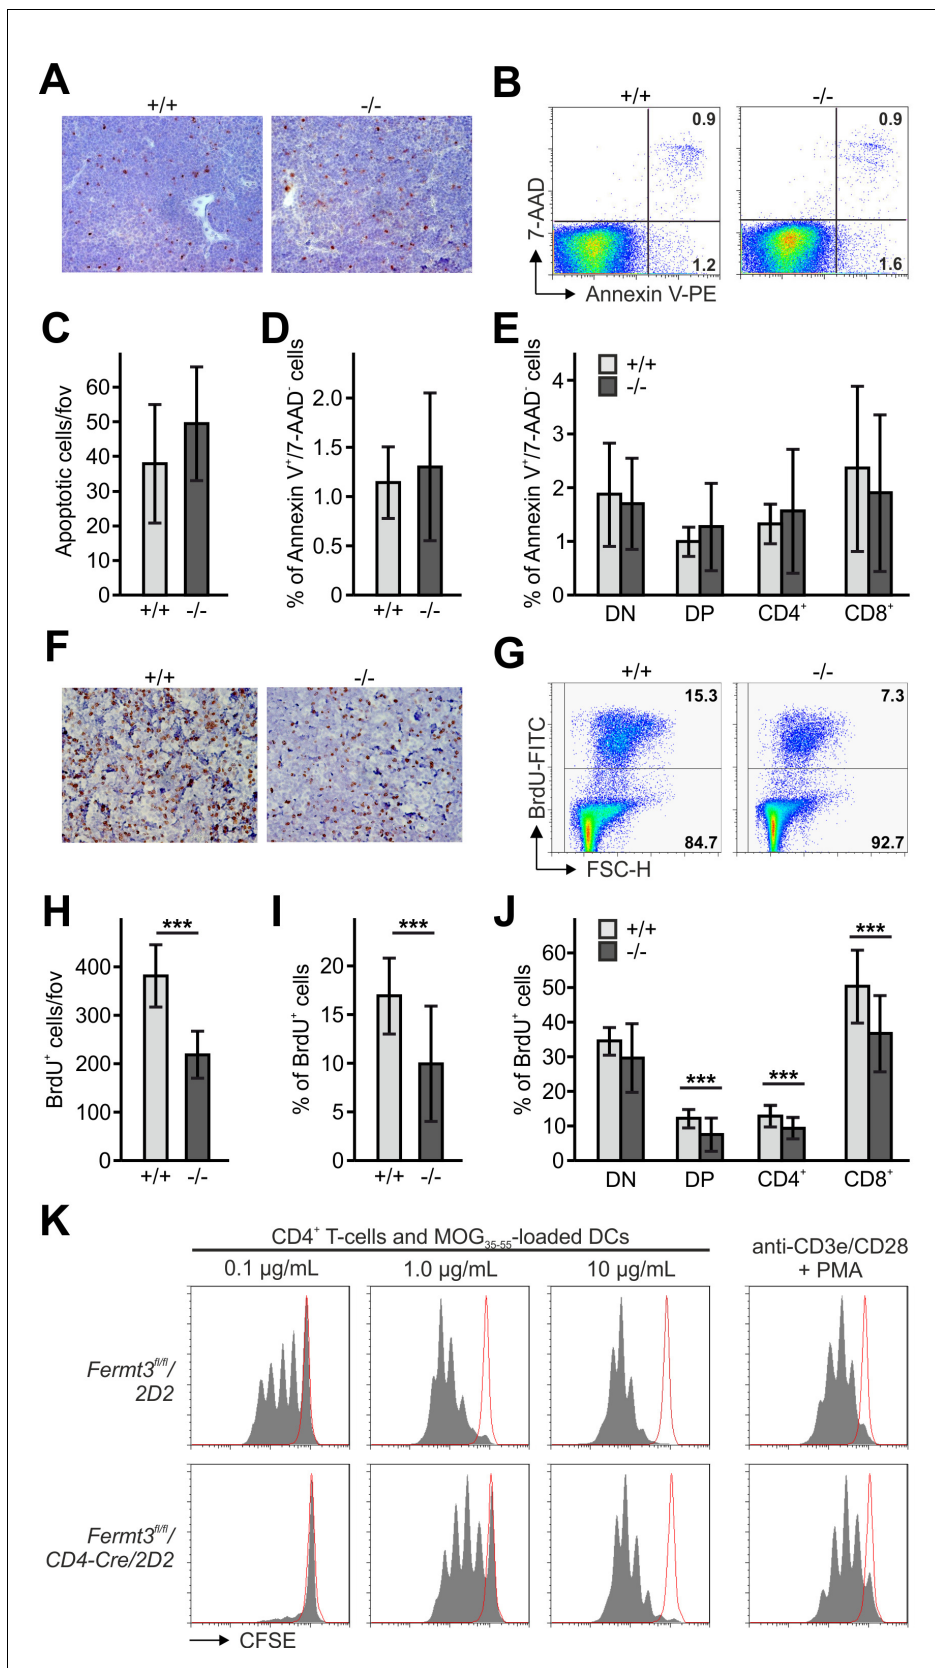

**Figure 2.** Reduced thymocyte proliferation contributes to thymus atrophy of kindlin-3-deficient mice. (A) Staining for cleaved caspase-3 counterstained with Mayer's haematoxylin on paraffin sections of *Fermt3*<sup>+/+</sup> and *Fermt3*<sup>-/-</sup> P3 thymi. Scale bar 100  $\mu$ m. (B) Single-cell suspensions of thymocytes from Figure 2 continued on next page

## Figure 2 continued

control and *Fermt3*<sup>-/-</sup> P3 thymi were stained with the apoptotic (Annexin V) and dead cell (7-AAD) markers. Numbers within the FACS blots represent percent of cells within each quadrant. (C) Number of apoptotic cells per field of view (fov) observed in (A). N = 10. Percentage of early apoptotic cells (Annexin V<sup>+</sup>, 7-AAD<sup>-</sup>) in control and *Fermt3*<sup>-/-</sup> thymi (D) and in distinct T cell subpopulations (CD4/CD8 DN, CD4/CD8 DP, CD4 single positive and CD8 single positive) (E). N = 7/10. (F) Sections of *Fermt3*<sup>+/+</sup> and *Fermt3*<sup>-/-</sup> P3 thymi stained for BrdU incorporation and counterstained with Mayer's haematoxylin. Scale bar 100 μm. (G) BrdU incorporation in thymocytes analysed by flow cytometry. (H) Numbers of BrdU positive cells per field of view (fov) observed in (F). N = 8/6. (I) Percentage of proliferating, BrdU positive thymocytes measured by flow cytometry. N = 14. (J) Percentage of BrdU positive cells in distinct T cell subpopulations. N = 14. (K) CD4 T cells isolated from spleens of control *Fermt3*<sup>fl/fl</sup>/2D2 and *Fermt3*<sup>fl/fl</sup>/2D2/CD4Cre mice were stained with CFSE and stimulated either with DCs loaded with different concentrations of MOG<sub>35-55</sub> peptide or primed with anti-CD3e/CD28 antibodies and PMA. Representative histograms show CFSE dilution. Red-lined histograms represent cells incubated with not-loaded DCs or no antibodies. Bars indicate means ± standard errors. \*\*p<0.01; \*\*\*p<0.001. See also **Figure 2—figure supplement 1**.

DOI: <https://doi.org/10.7554/eLife.35816.004>

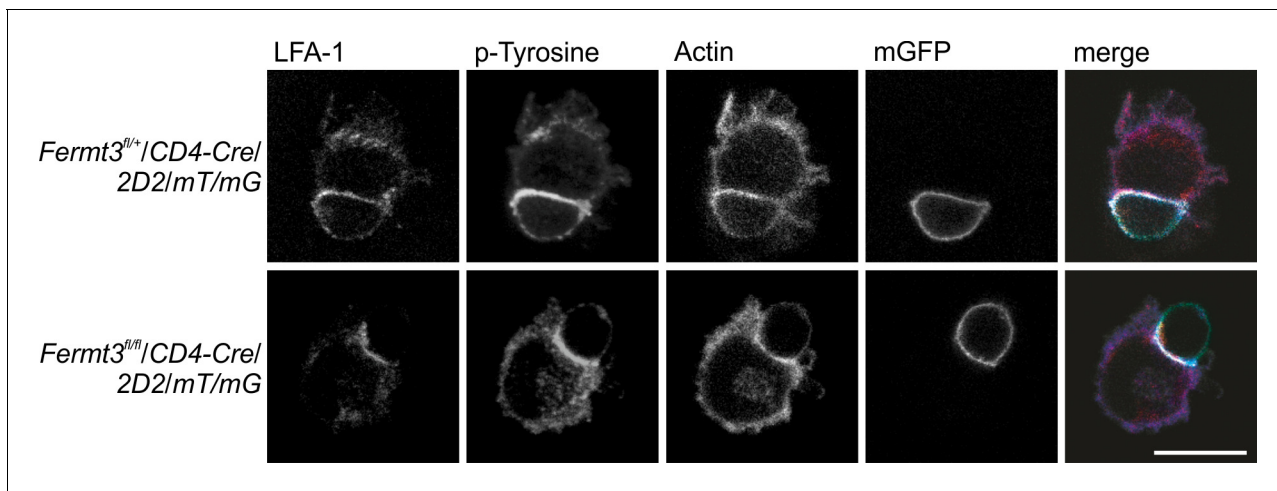

**Figure 2—figure supplement 1.** Reduced thymocyte proliferation contributes to thymus atrophy of kindlin-3-deficient mice. Kindlin-3-deficient CD4<sup>+</sup> T cells are able to form immune synapses with dendritic cells. Mature wild-type dendritic cells loaded with MOG35-55 peptide were incubated with CD4<sup>+</sup> T cells from *Fermt3*<sup>fl/+</sup> (*K3*<sup>fl/+</sup>) and *Fermt3*<sup>fl/fl</sup> (*K3*<sup>fl/fl</sup>) mice expressing Cre-recombinase under the control of the CD4 promoter, a MOG35-35 specific TCR (2D2) and a double fluorescent reporter transgene to verify Cre activity (*mT/mG*). Cells were stained for intergrin LFA-1, tyrosin-phosphorylated proteins and actin and imaged by confocal microscopy. Size bar 10  $\mu$ m.

DOI: <https://doi.org/10.7554/eLife.35816.005>

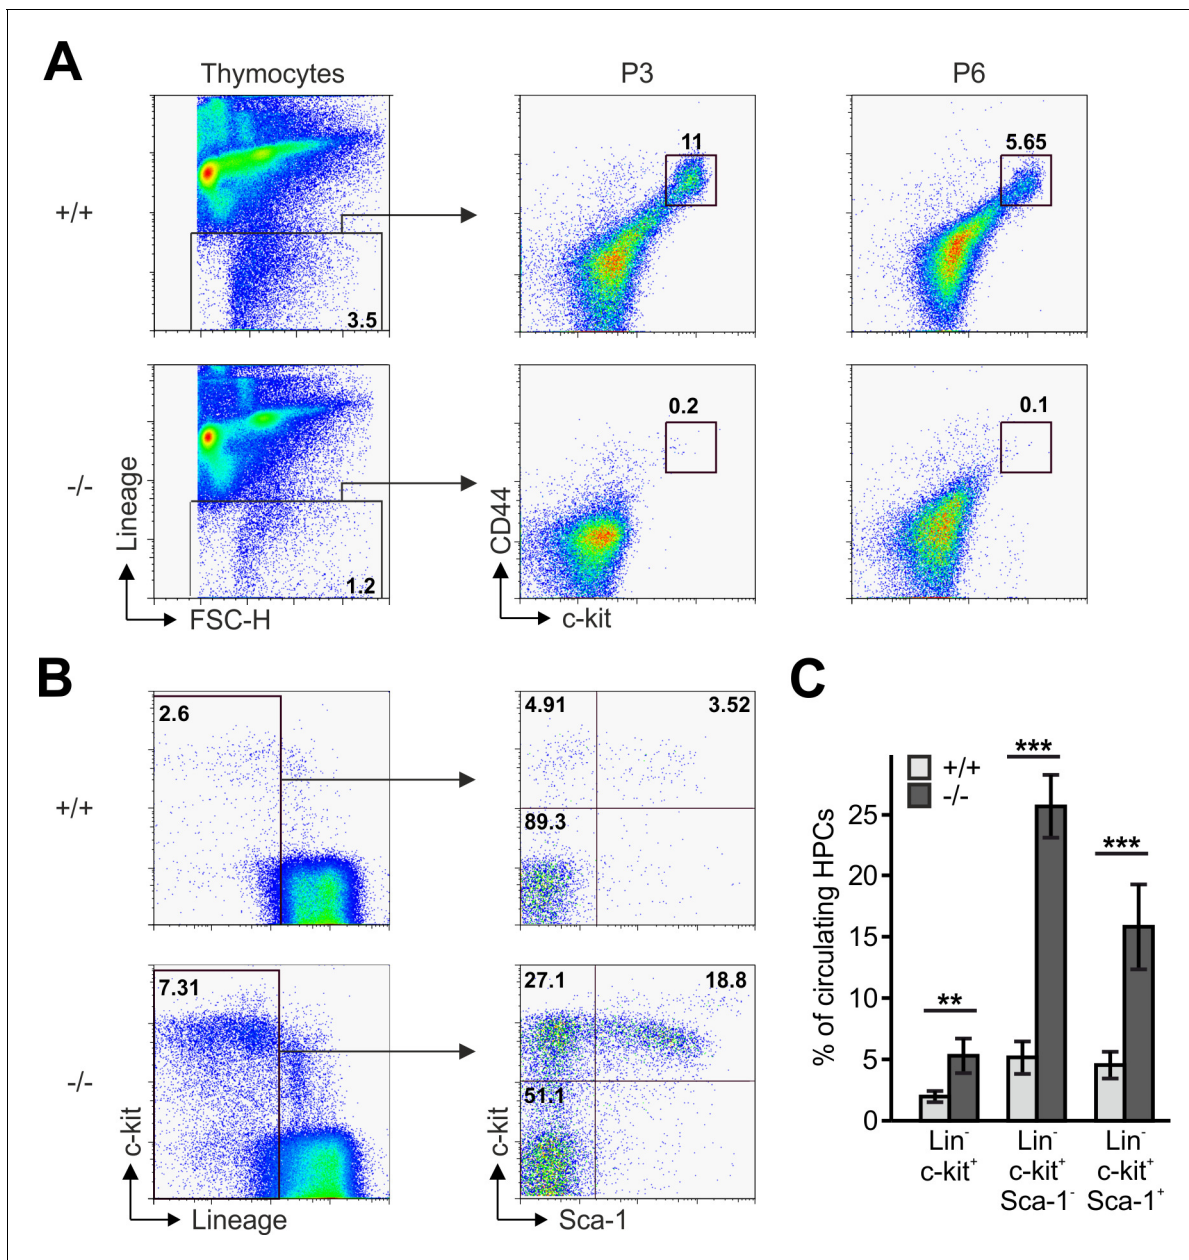

**Figure 3.** Reduced frequencies of T cell progenitors in *Fermt3*<sup>-/-</sup> thymi. (A) Thymocytes from *Fermt3*<sup>+/+</sup> and *Fermt3*<sup>-/-</sup> mice were stained for lineage markers (B220, CD19, TER119, NK1.1, CD11b, Gr-1, CD8α, CD3e, TCRβ, TCRγδ and CD11c), CD44 and c-kit to identify DN<sub>1-2</sub> (Lin<sup>neg</sup>, c-kit<sup>hi</sup>, CD44<sup>hi</sup>) and the DN<sub>3-4</sub> (Lin<sup>neg</sup>, c-kit<sup>low</sup>, CD44<sup>low</sup>) populations. (B and C) PB from *Fermt3*<sup>+/+</sup> and *Fermt3*<sup>-/-</sup> animals (P3) were stained for lineage markers (TER119, B220, CD11b, Gr-1, CD11c, NK1.1, CD4 and CD8α), c-kit and Sca-1 to identify hematopoietic progenitor cells and analysed by flow cytometry. N = 4. Numbers within the representative FACS plots indicate cell percentages. Bars indicate means ± standard errors. \*\*p<0.01; \*\*\*p<0.001. See also **Figure 3—figure supplement 1**.

DOI: <https://doi.org/10.7554/eLife.35816.006>

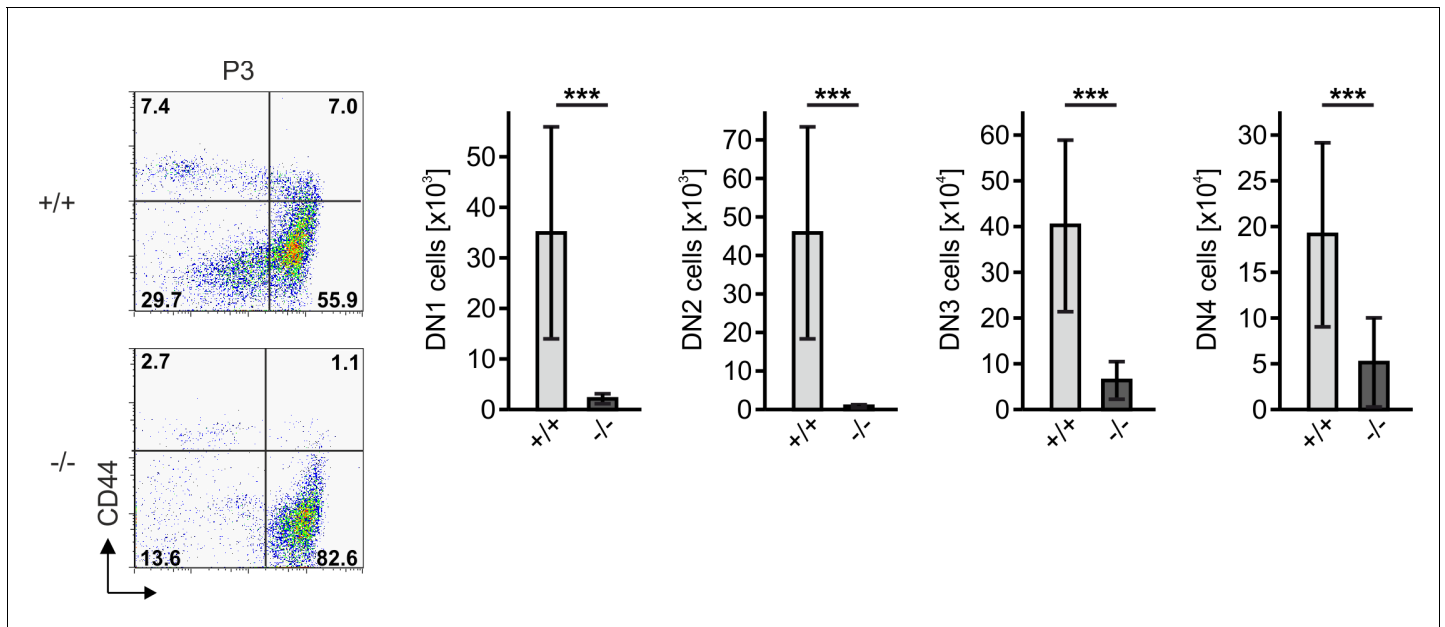

**Figure 3—figure supplement 1.** Reduced frequencies of T cell progenitors in *Fermt3*<sup>-/-</sup> thymi. Thymocytes from *Fermt3*<sup>+/+</sup> and *Fermt3*<sup>-/-</sup> P3 mice were stained for lineage markers (B220, CD19, TER119, NK1.1, CD11b, Gr-1, CD8α, CD3ε, TCRβ, TCRγδ and CD11c), CD44 and CD25 to identify and quantify DN1 (Lin<sup>neg</sup>, CD44<sup>hi</sup>, CD25<sup>-</sup>), DN2 (Lin<sup>neg</sup>, CD44<sup>hi</sup>, CD25<sup>+</sup>), DN3 (Lin<sup>neg</sup>, CD44<sup>low</sup>, CD25<sup>+</sup>) and DN4 (Lin<sup>neg</sup>, CD44<sup>low</sup>, CD25<sup>-</sup>) populations by flow cytometry. Numbers within FACS plots indicate cell percentages. Total number of DN1, DN2, DN3 and DN4 cells were measured by flow cytometry. N = 20. Bars indicate means ± standard errors. \*p<0.05; \*\*p<0.01; \*\*\*p<0.001.

DOI: <https://doi.org/10.7554/eLife.35816.007>

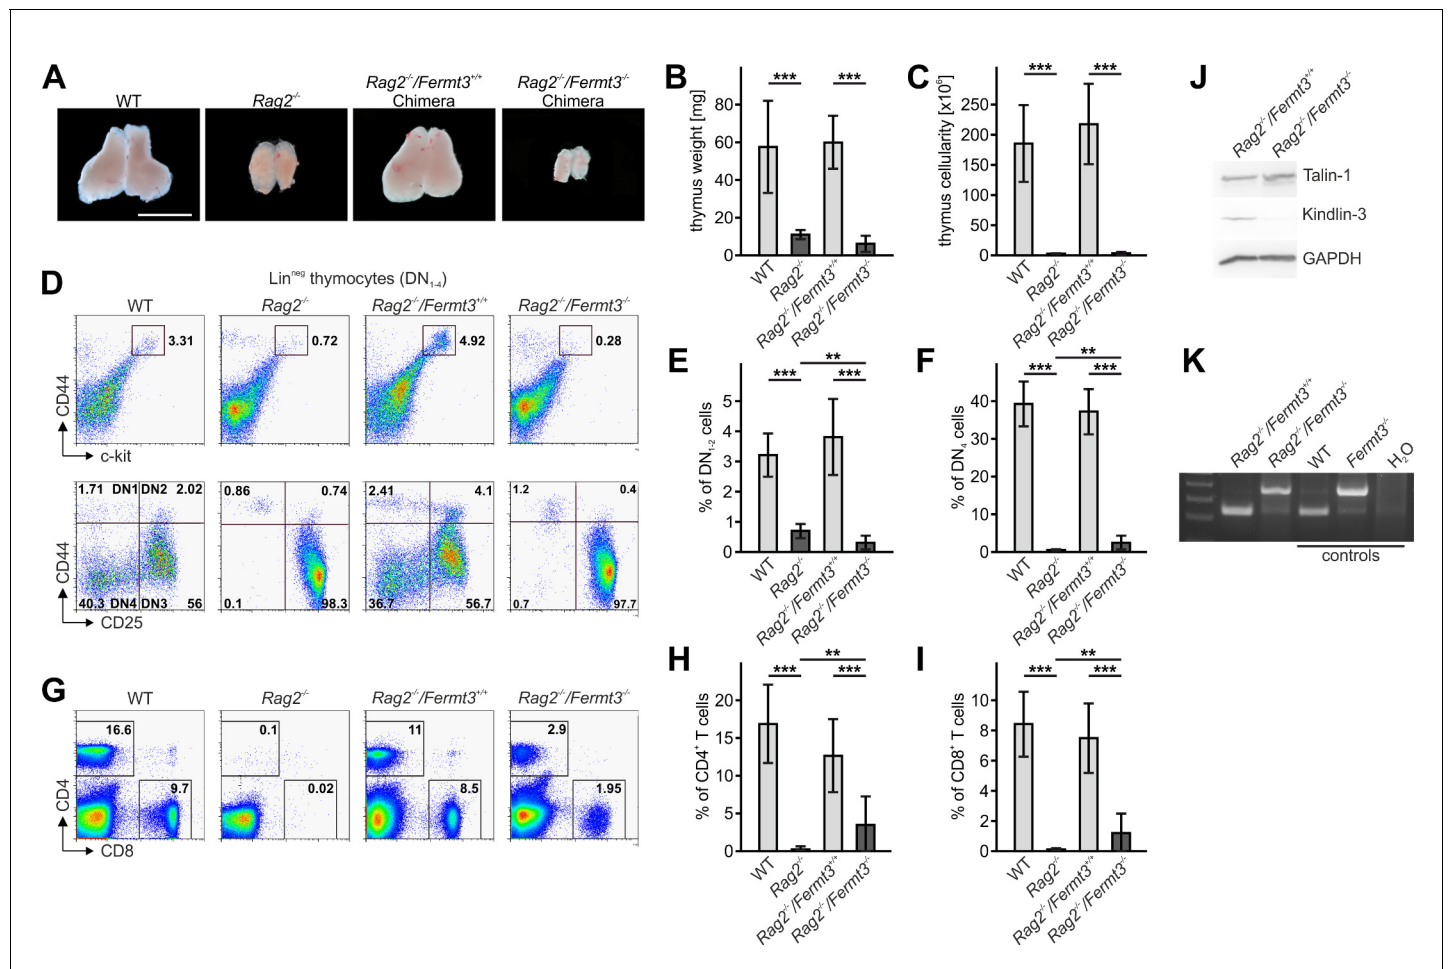

**Figure 4.** Kindlin-3-deficient T cell progenitors are severely impaired in seeding the adult thymus. (A–C) Images (A), weights (B) and cell numbers (C) of thymi from adult WT and *Rag2*<sup>-/-</sup> mice and *Rag2*<sup>-/-</sup> mice 10 weeks after reconstitution with *Fermt3*<sup>+/+</sup> and *Fermt3*<sup>-/-</sup> fetal liver cells. Scale bar 5 mm. N = 10. (D) Single-cell suspensions were stained for lineage markers (B220, CD19, TER119, NK1.1, CD11b, Gr-1, CD11c, CD8α, CD3e, TCRβ, and TCRγδ), c-kit, CD44 and CD25 to identify the DN<sub>1-2</sub> (Lin<sup>neg</sup>, c-kit<sup>hi</sup>, CD44<sup>hi</sup>) and the DN<sub>3-4</sub> (Lin<sup>neg</sup>, c-kit<sup>low</sup>, CD44<sup>low</sup>) populations (upper panel), and DN1 (Lin<sup>neg</sup>, CD44<sup>hi</sup>, CD25<sup>-</sup>), DN2 (Lin<sup>neg</sup>, CD44<sup>hi</sup>, CD25<sup>+</sup>), DN3 (Lin<sup>neg</sup>, CD44<sup>low</sup>, CD25<sup>+</sup>) and DN4 (Lin<sup>neg</sup>, CD44<sup>low</sup>, CD25<sup>-</sup>) populations (lower panel) by flow cytometry. Frequencies of DN<sub>1-2</sub> (E) and DN4 (F) thymocytes. N = 8–10. (G) Analysis of peripheral blood T-lymphocytes. (H and I) Frequencies of circulating CD4<sup>+</sup> and CD8<sup>+</sup> T cells calculated from flow cytometric analyses shown in (G). N = 10. Numbers within the representative FACS plots indicate cell percentages. (J) Expression of talin-1 and kindlin-3 in CD4<sup>+</sup> T cells isolated from the spleen of *Rag2*<sup>-/-</sup> mice after reconstitution with *Fermt3*<sup>+/+</sup> and *Fermt3*<sup>-/-</sup> fetal liver cells. GAPDH serves as loading control. (K) genomic PCR of CD8<sup>+</sup> T cells sorted from the spleen of *Rag2*<sup>-/-</sup>/*Fermt3*<sup>+/+</sup> and *Rag2*<sup>-/-</sup>/*Fermt3*<sup>-/-</sup> chimeras. Numbers within the representative FACS plots indicate cell percentages. Bars indicate means ± standard errors. \*\*p<0.01; \*\*\*p<0.001. See also **Figure 4—figure supplements 1 and 2**.

DOI: <https://doi.org/10.7554/eLife.35816.008>



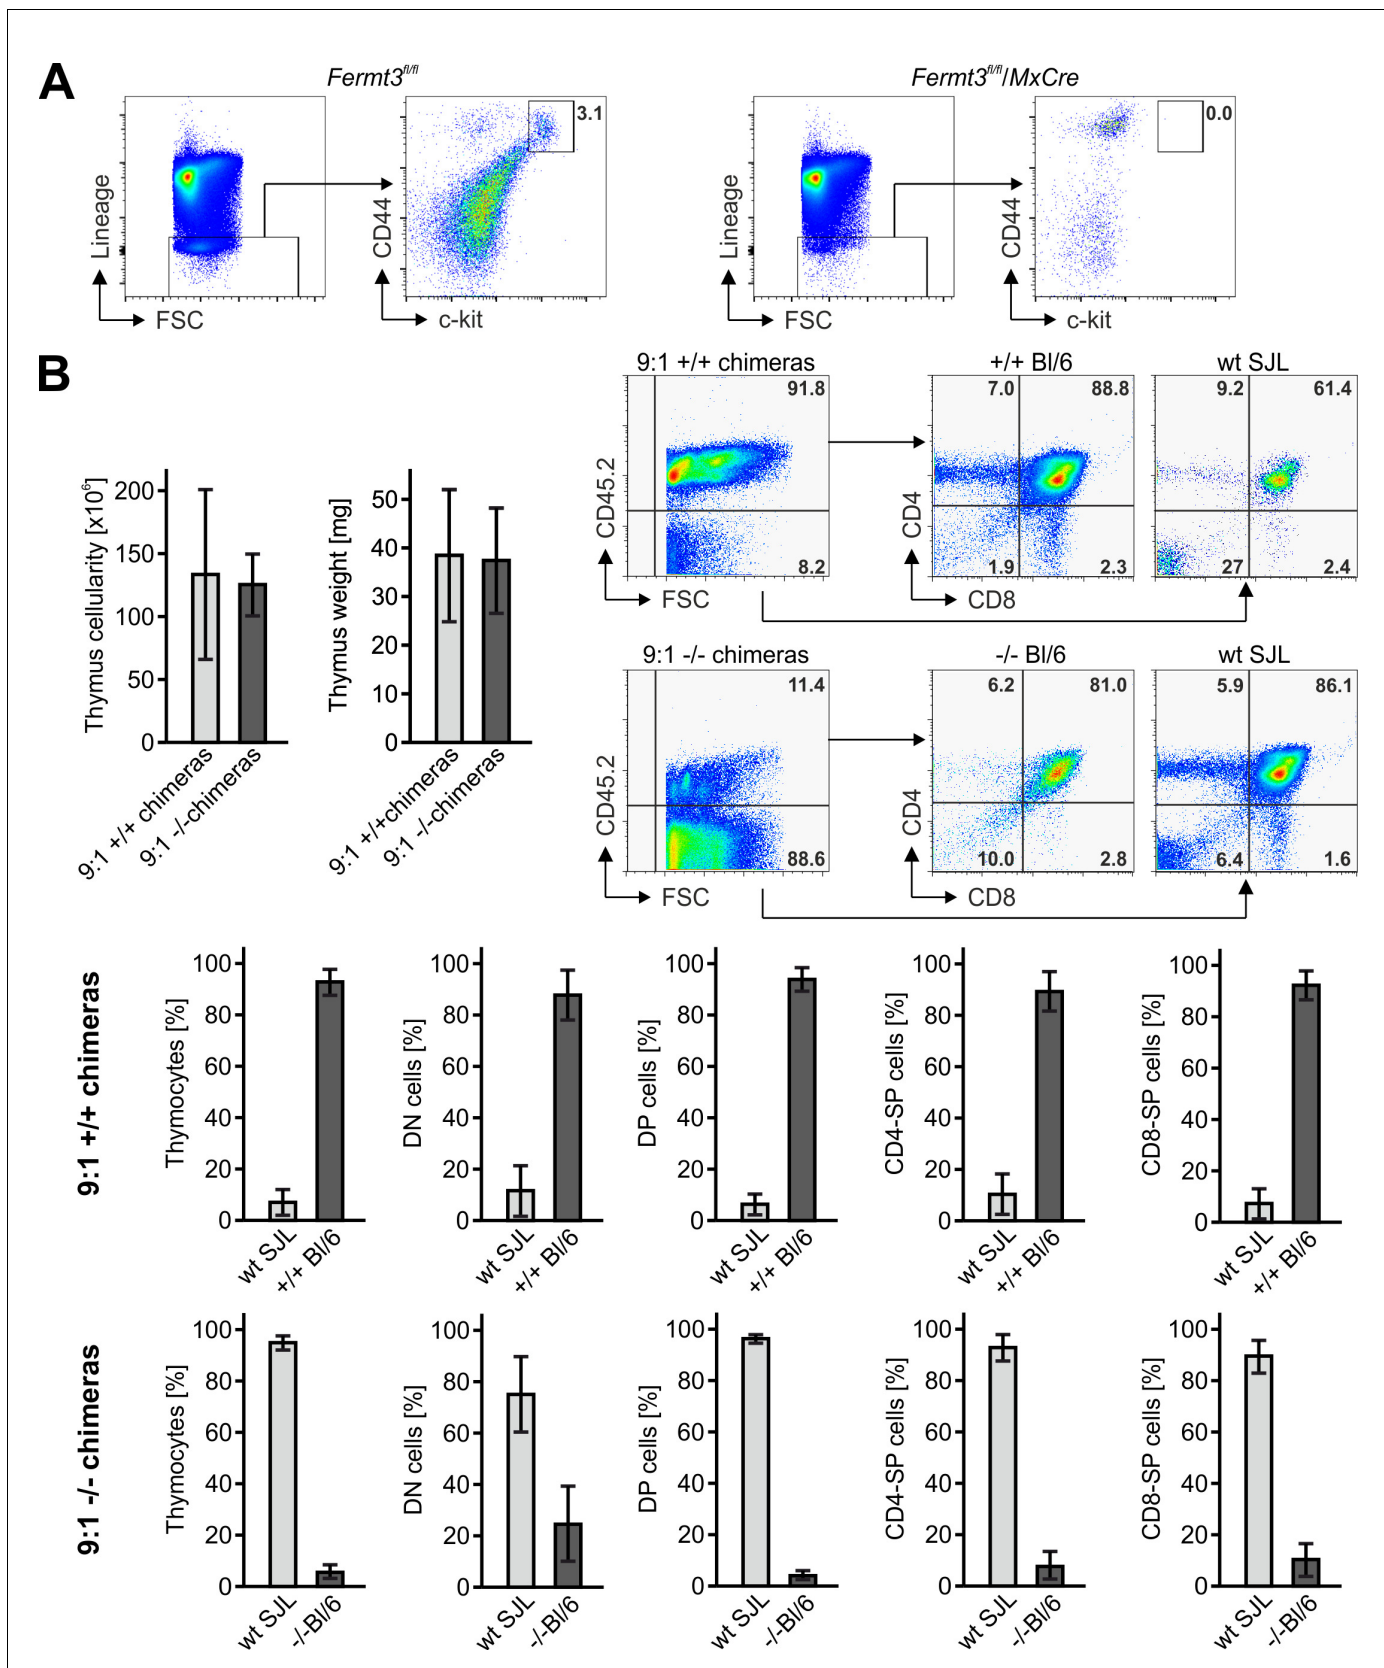

**Figure 4—figure supplement 1.** Kindlin-3-deficient T cell progenitors are severely impaired in seeding the adult thymus. (A) Thymocytes from polyIC-induced *Fermt3<sup>fl/fl</sup>/Mx1-Cre*-negative and *Fermt3<sup>fl/fl</sup>/Mx1-Cre*-positive mice were stained for lineage markers (B220, CD19, TER119, NK1.1, CD11b, Gr-1, Figure 4—figure supplement 1 continued on next page

## Figure 4—figure supplement 1 continued

CD8 $\alpha$ , CD3 $\epsilon$ , TCR $\beta$ , TCR $\gamma\delta$  and CD11c), CD44 and c-kit to identify the DN<sub>1-2</sub> population (Lin<sup>neg</sup>, c-kit<sup>hi</sup>, CD44<sup>hi</sup>). (B) Cell numbers, weight and flow cytometric analyses of thymi from mixed FL cell chimeras, which received a 9:1 ratio of FL cells from *Fermt3*<sup>+/+</sup> or *Fermt3*<sup>-/-</sup> embryos (CD45.2) and WT B6.SJL FL cells (CD45.1). Cells were stained for CD45.2, CD4 and CD8. Numbers within FACS plots indicate cell percentages. Frequencies of DP, DN and SP CD4 and CD8 T cells were calculated from flow cytometric analyses. N = 8/10. Bars indicate means  $\pm$  standard errors.

DOI: <https://doi.org/10.7554/eLife.35816.009>



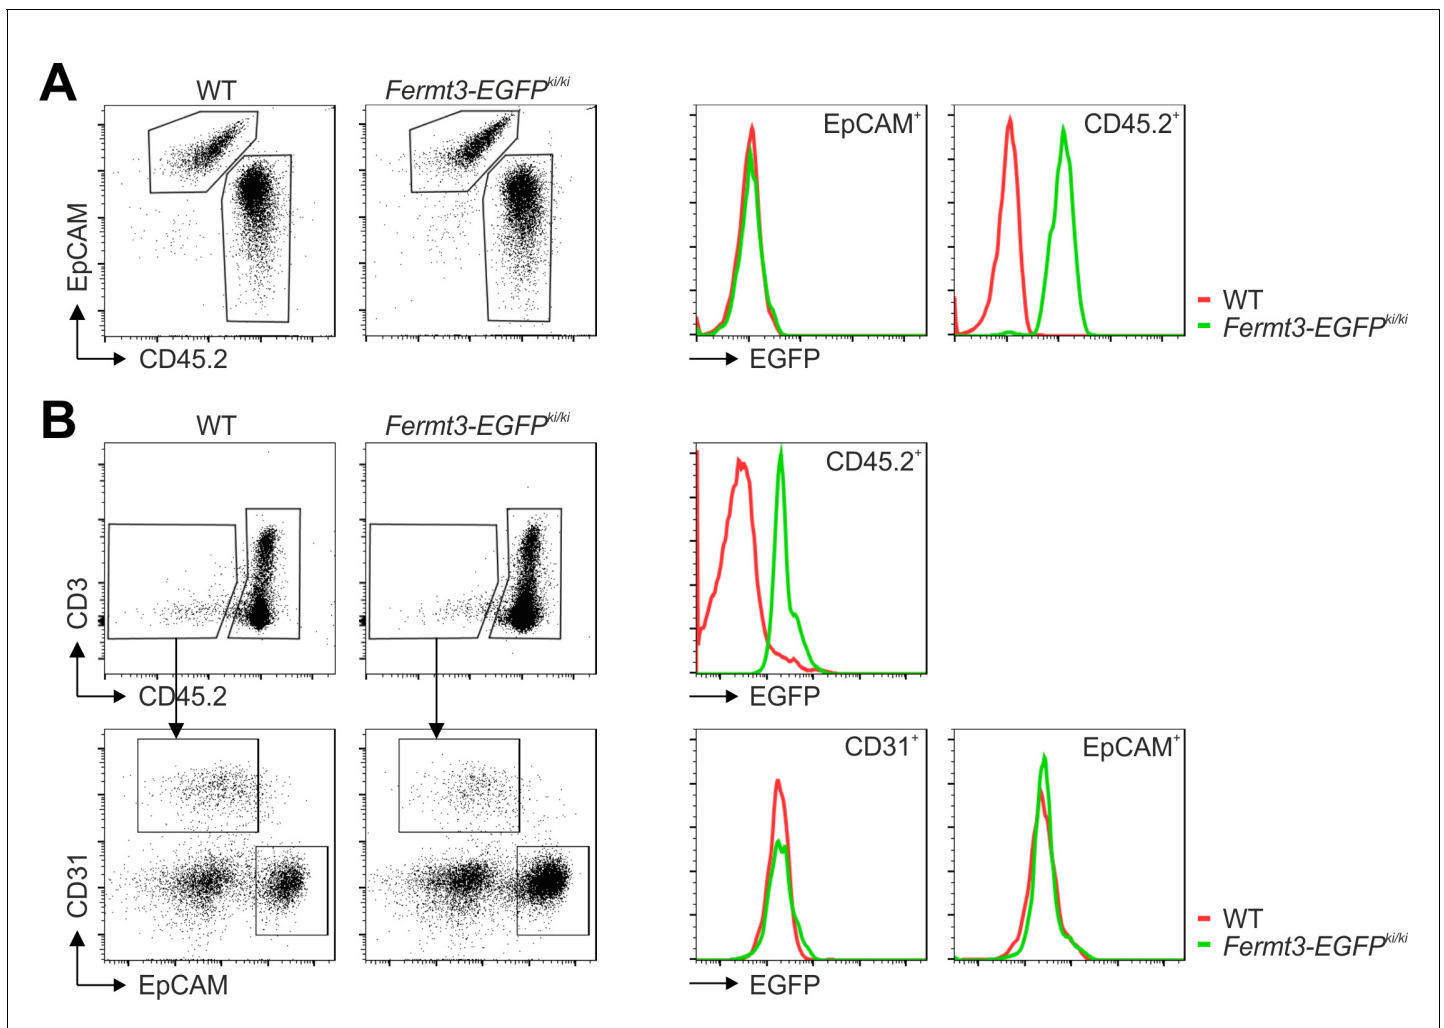

**Figure 4—figure supplement 2.** Kindlin-3-deficient T cell progenitors are severely impaired in seeding the adult thymus. Kindlin-3 is exclusively expressed in hematopoietic cells of the thymus. (A) Single cell suspensions of thymi from E15.5 embryos of WT (+/+) and Kindlin-3-EGFP knockin (*Fermt3-EGFP* *ki/ki*) mice were stained for CD45.2 and the thymic epithelial marker EpCAM. Both populations were analysed for EGFP expression. (B) Thymic cells from adult WT and *Fermt3-EGFP* knockin mice were stained for CD45.2, CD3, CD31 and EpCAM to distinguish between hematopoietic, endothelial and thymic epithelial cells. All subpopulations were analysed for EGFP expression.

DOI: <https://doi.org/10.7554/eLife.35816.010>

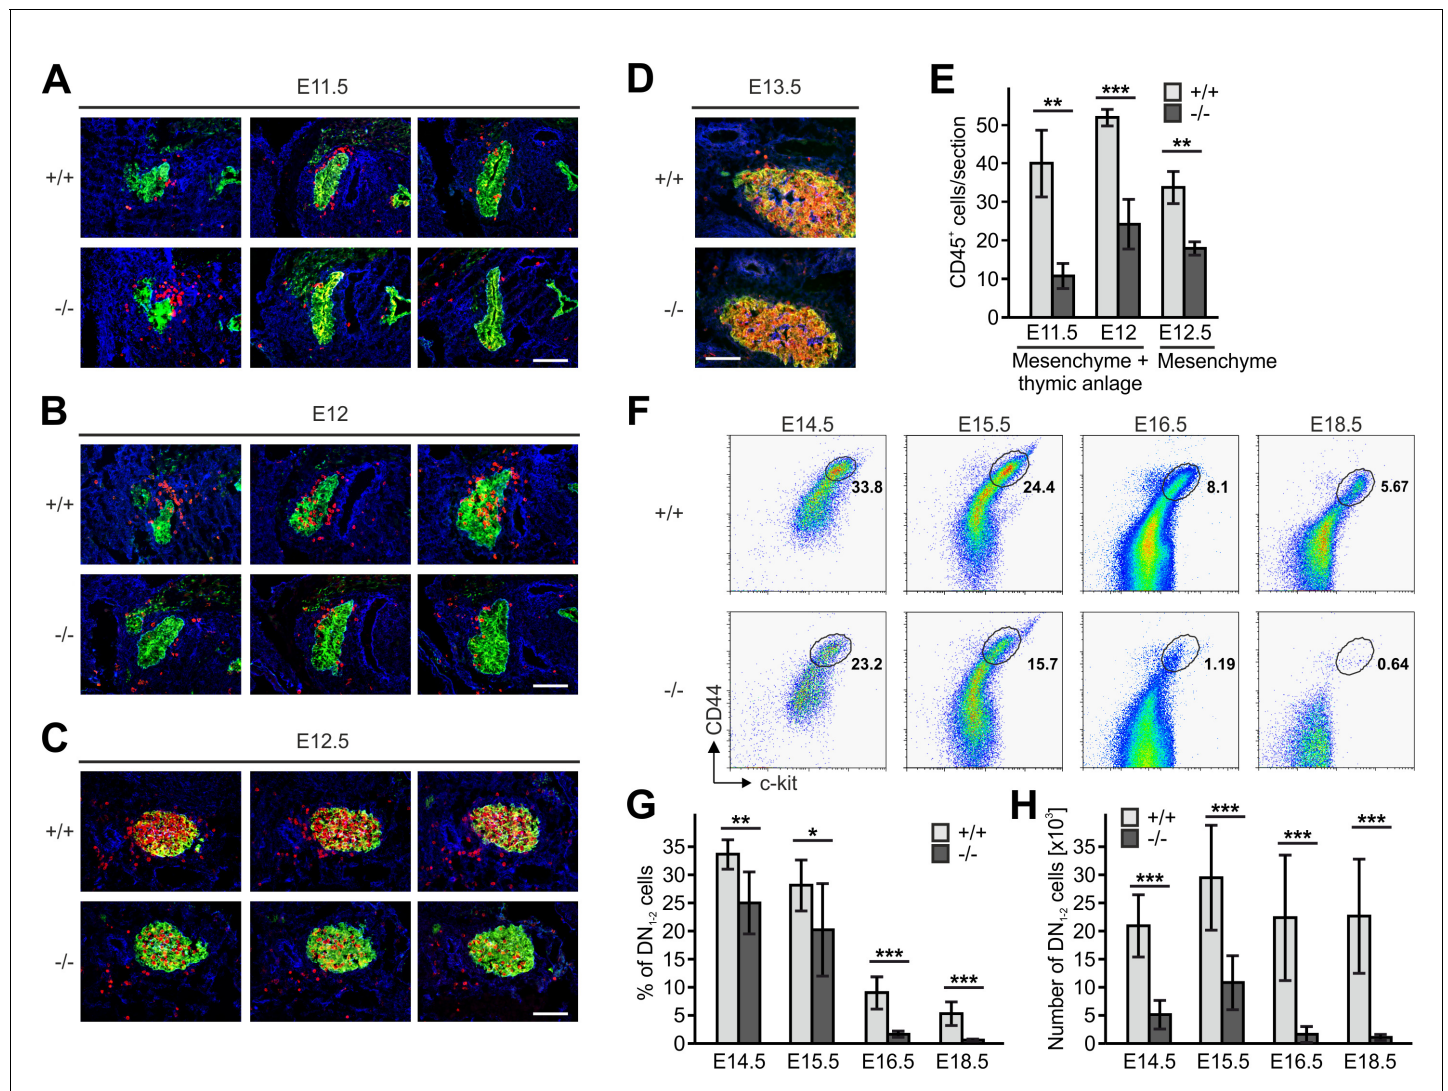

**Figure 5.** Kindlin-3-independent colonization of the fetal thymus. (A–D) Sagittal sections of whole embryos at gestational ages E11.5 (A), E12 (B), E12.5 (C) and E13.5 (D) were stained for fibronectin (perithymic mesenchyme, blue), cytokeratin (thymic primordium, green) and CD45 (potential T cell progenitor cells, red). Scale bars 100  $\mu$ m. (E) Numbers of CD45<sup>+</sup> cells within the thymic primordium and in the perithymic mesenchyme at the indicated time points. N = 3–4. (F) Representative flow cytometric profiles of fetal thymocytes from control and *Fermt3*<sup>-/-</sup> thymi at the indicated time points stained for lineage markers (B220, CD19, TER119, NK1.1, CD11b, Gr-1, CD11c, CD8 $\alpha$ , CD3e, TCR $\beta$ , and TCR $\gamma\delta$ ), c-kit and CD44 to identify the DN<sub>1,2</sub> (Lin<sup>neg</sup>, c-kit<sup>hi</sup>, CD44<sup>hi</sup>) and the DN<sub>3,4</sub> (Lin<sup>neg</sup>, c-kit<sup>low</sup>, CD44<sup>low</sup>) populations. Numbers within the representative FACS plots indicate cell percentages. Frequencies (G) and total number (H) of DN<sub>1,2</sub> cells measured in the flow cytometric analyses shown in (F). N = 7–10 Bars indicate means  $\pm$  standard errors. \*p<0.05; \*\*p<0.01; \*\*\*p<0.001. See also **Figure 5—figure supplement 1**.

DOI: <https://doi.org/10.7554/eLife.35816.011>

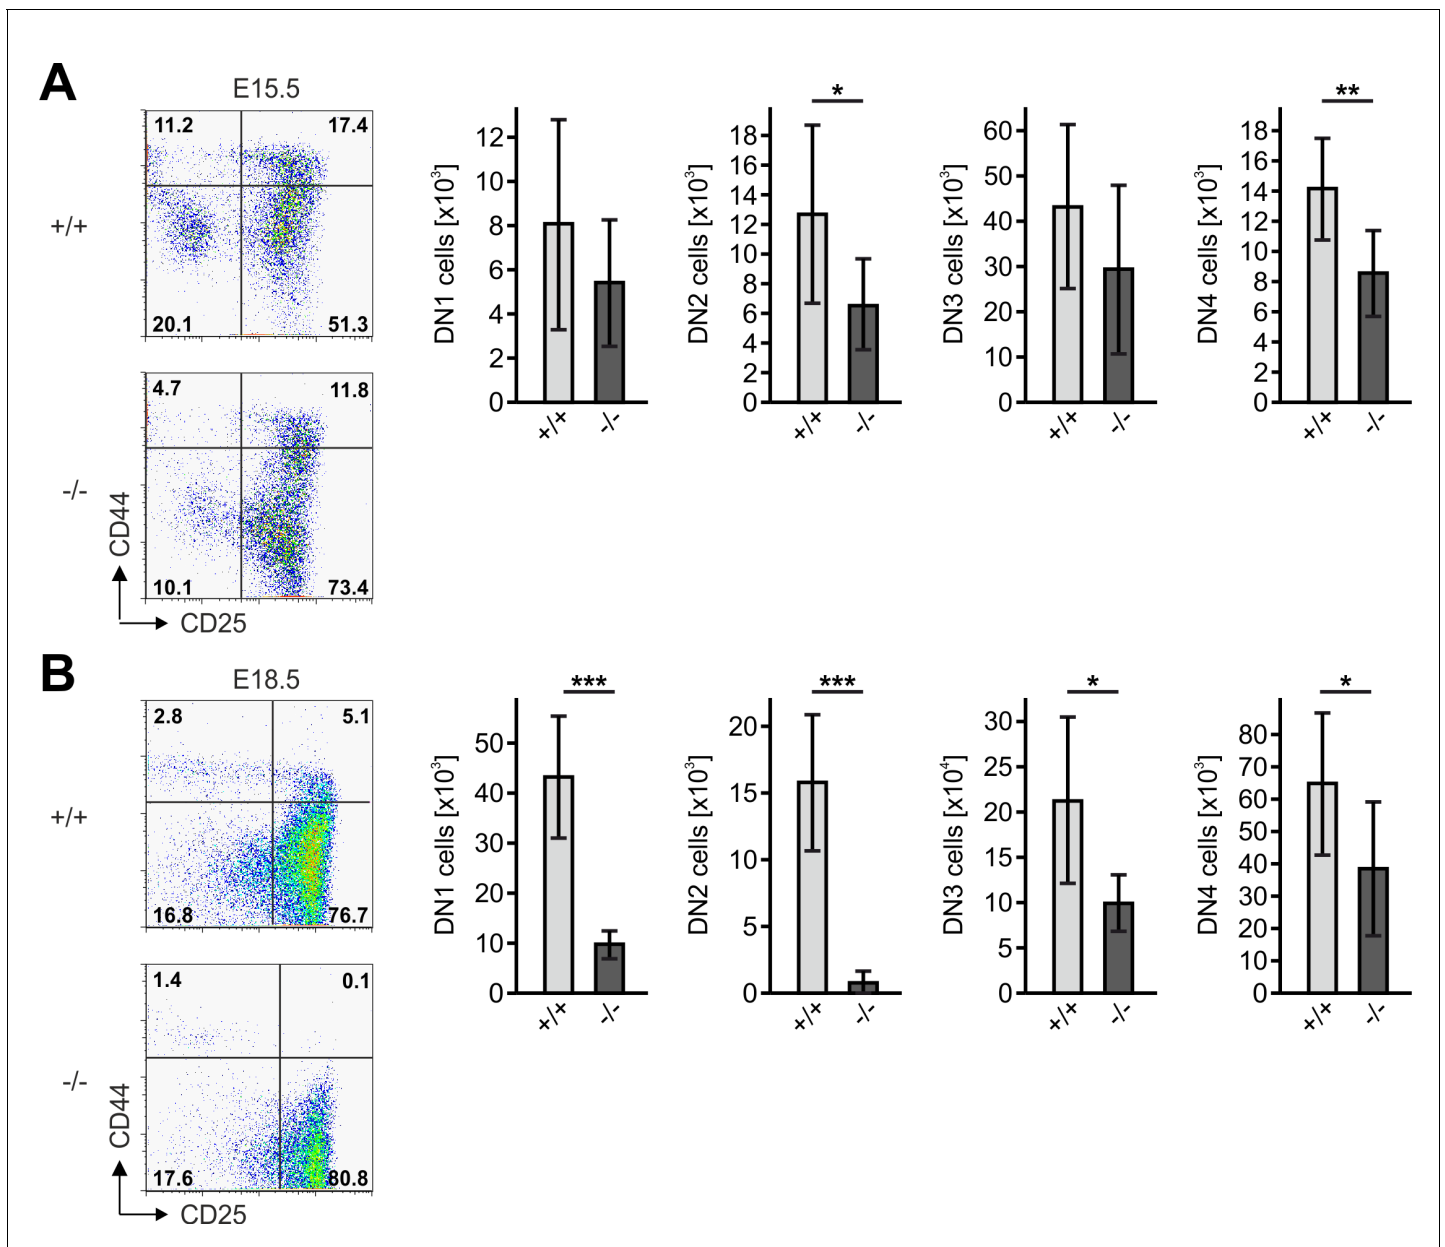

**Figure 5—figure supplement 1.** Kindlin-3-independent colonization of the fetal thymus. Kindlin-3-deficient T cell progenitors colonize the fetal thymus but decrease with age. Thymocytes from *Fermt3*<sup>+/+</sup> and *Fermt3*<sup>-/-</sup> E15.5 (A) and E18.5 (B) embryos were stained for lineage markers (B220, CD19, TER119, NK1.1, CD11b, Gr-1, CD8 $\alpha$ , CD3 $\epsilon$ , TCR $\beta$ , TCR $\gamma\delta$  and CD11c), CD44 and CD25 to identify and quantify DN1 (Lin<sup>neg</sup>, CD44<sup>hi</sup>, CD25<sup>+</sup>), DN2 (Lin<sup>neg</sup>, CD44<sup>hi</sup>, CD25<sup>+</sup>), DN3 (Lin<sup>neg</sup>, CD44<sup>low</sup>, CD25<sup>+</sup>) and DN4 (Lin<sup>neg</sup>, CD44<sup>low</sup>, CD25<sup>+</sup>) populations by flow cytometry. Numbers within FACS plots indicate cell percentages. Total number of DN1, DN2, DN3 and DN4 cells were measured by flow cytometry. N = 6–8. Bars indicate means  $\pm$  standard errors. \* $p < 0.05$ ; \*\* $p < 0.01$ ; \*\*\* $p < 0.001$ .

DOI: <https://doi.org/10.7554/eLife.35816.012>

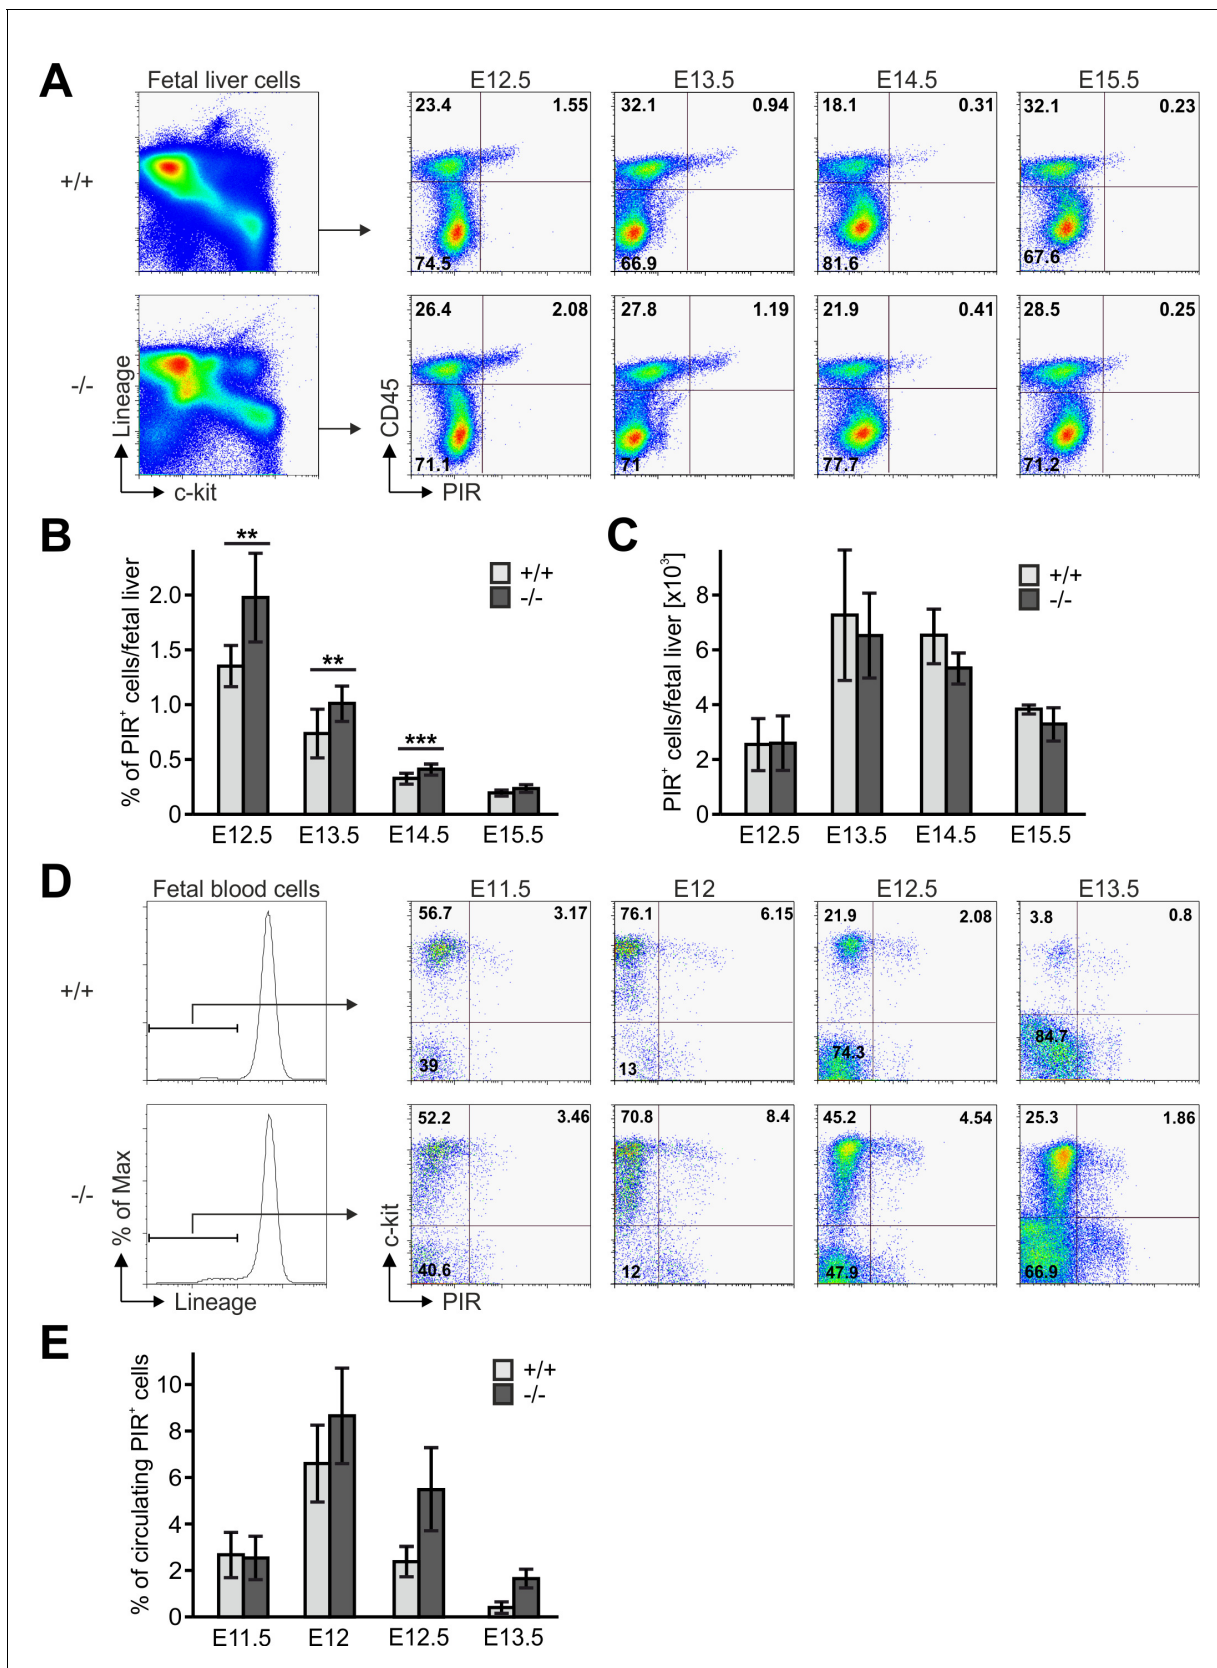

**Figure 6.** Fetal liver-derived T cell progenitors accumulate in the blood. (A) Fetal liver cells from control and *Fermt3*<sup>-/-</sup> embryos from indicated gestational stages were stained for lineage markers (B220, CD19, TER119, NK1.1, Gr-1 and Thy1.2), c-kit, CD45 and PIR and analysed by flow cytometry. Figure 6 continued on next page

## Figure 6 continued

Frequencies (B) and total numbers (C) of PIR<sup>+</sup> T cell progenitors per fetal liver. N(E12.5)=7/6; N(E13.5)=8/5; N(E14.5)=10/11; N(E15.5)=4/7. (D) FB from *Fermt3*<sup>+/+</sup> and *Fermt3*<sup>-/-</sup> embryos were stained for lineage markers (B220, CD19, TER119, NK1.1, Gr-1 and Thy1.2), c-kit and PIR and analysed by flow cytometry. (E) Frequencies of circulating PIR<sup>+</sup> T cell progenitors determined in (D). N(E11.5)=5; N(E12)=8/3; N(E12.5)=4/5; N(E13.5)=7/6. Numbers within the representative FACS plots indicate cell percentages. Bars indicate means  $\pm$  standard errors. \*p<0.05; \*\*p<0.01; \*\*\*p<0.001.

DOI: <https://doi.org/10.7554/eLife.35816.013>



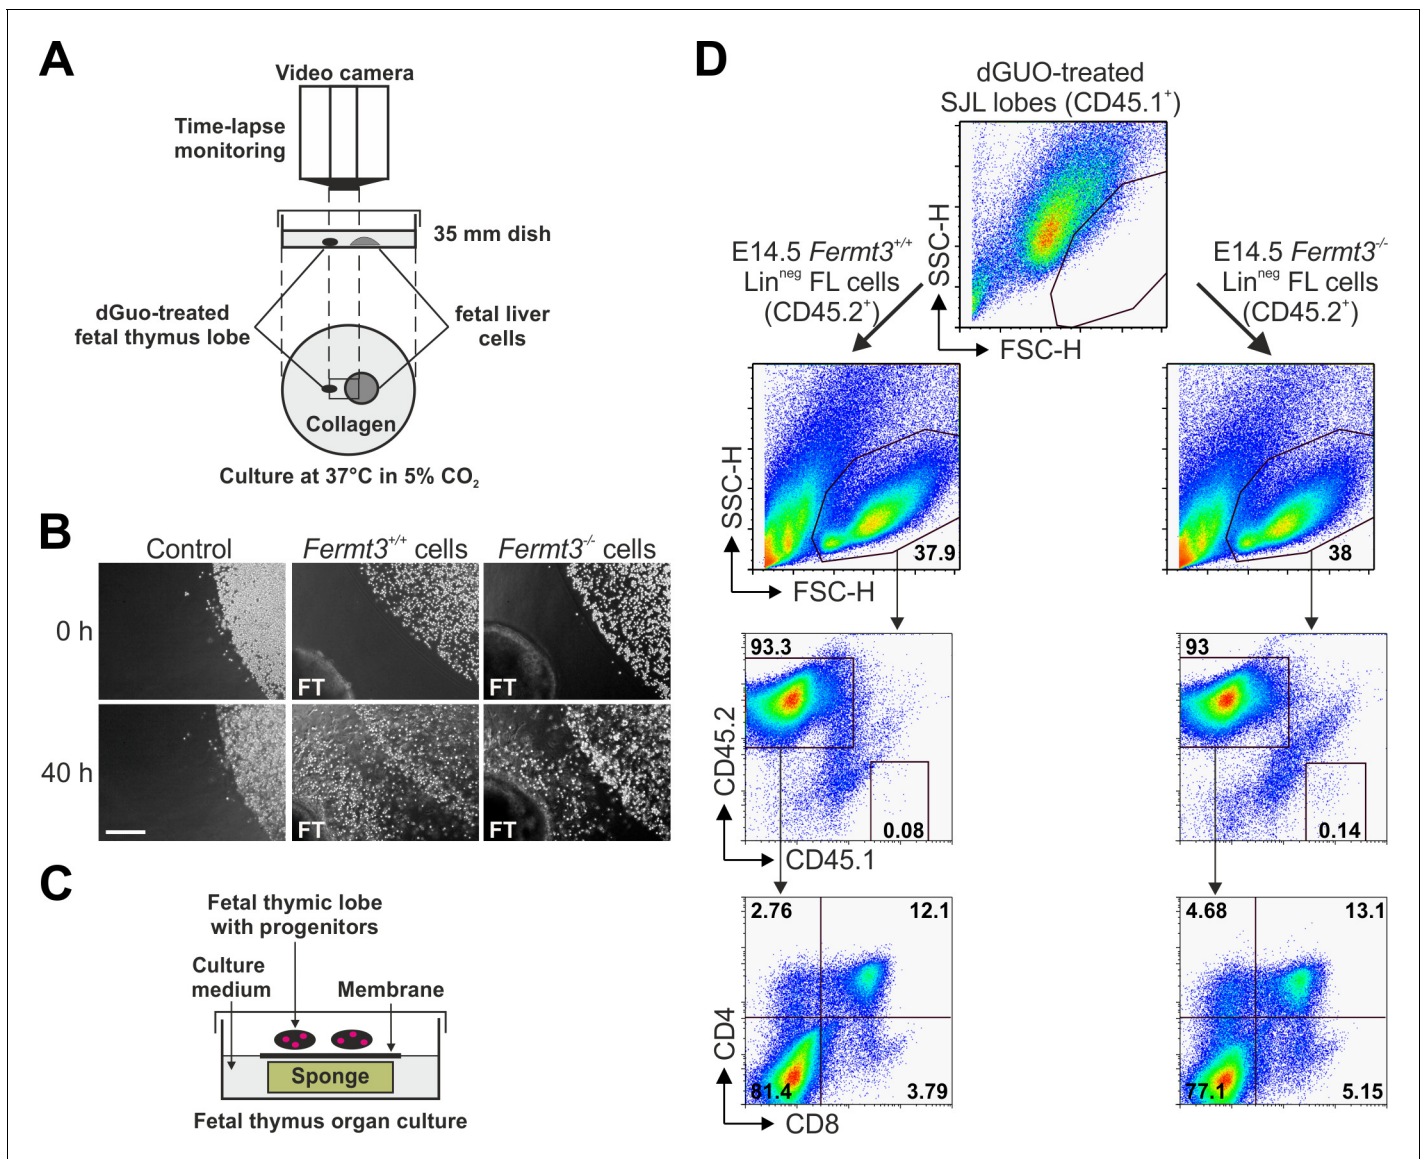

**Figure 7.** Kindlin-3-deficient T cell progenitors home to the fetal thymus and further develop into SP T cells ex vivo. (A) Schematic description of the thymus attraction experiment. (B) Representative images of the thymus attraction experiment at the beginning and 40 hr after starting the experiment. Lin<sup>neg</sup> fetal liver cells from control or *Fermt3*<sup>-/-</sup> embryos (both CD45.2<sup>+</sup>) are seen in the upper right corner of the images, a dGuo-treated wild-type fetal thymus lobe (FT, CD45.1<sup>+</sup>) is located at the lower left corner. Scale bar 250  $\mu$ m. (C) Schematic description of the fetal thymus organ culture. (D) dGuo-treated fetal thymus lobes seeded with fetal liver cells as performed in (B) were further cultured for 18 days. Cells were stained for CD45.1, CD45.2, CD4, and CD8. Numbers within the representative FACS plots indicate cell percentages.

DOI: <https://doi.org/10.7554/eLife.35816.014>

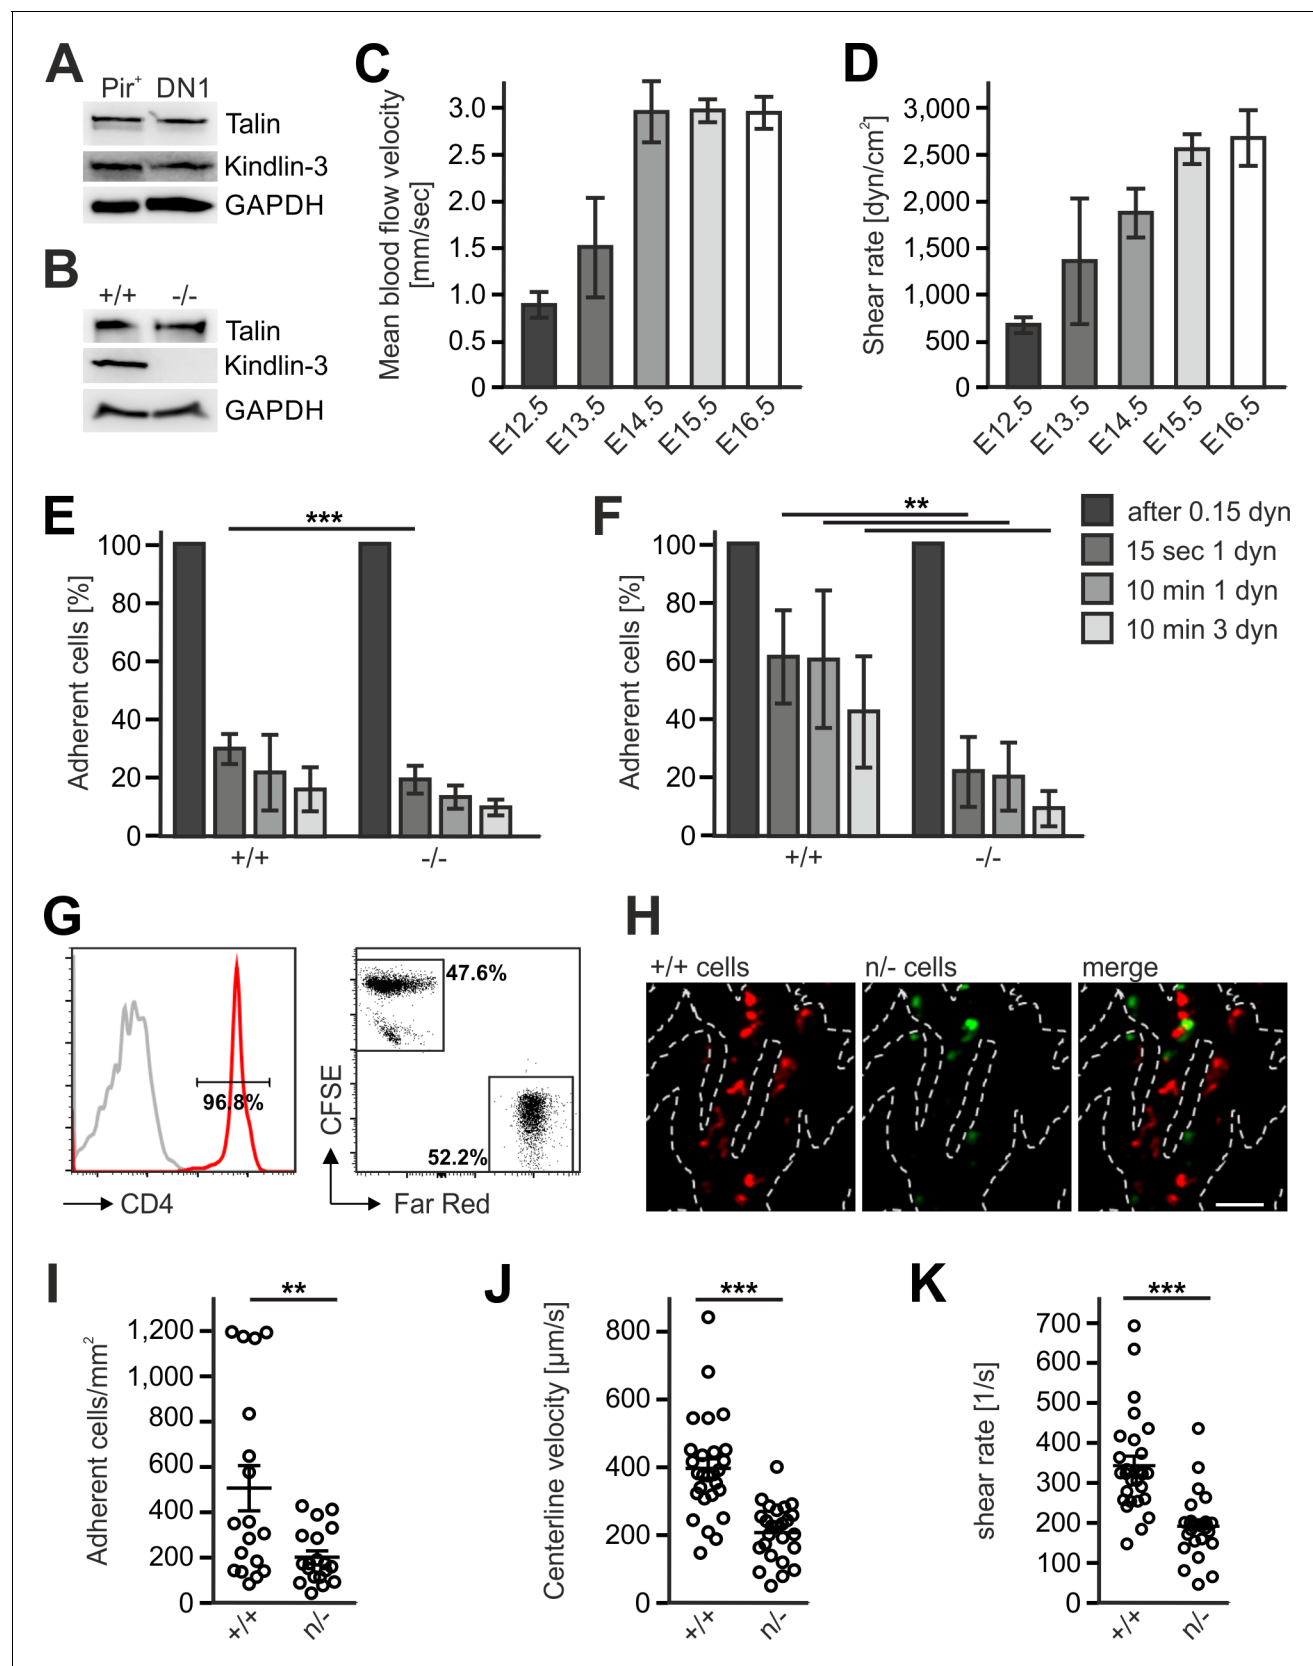

**Figure 8.** Kindlin-3 is important to stabilize the adhesion of T cell progenitors and mature T cells to vascular integrin ligands when blood flow velocities and shear rate levels increase during development and in vessel segments of higher blood flow within lymph nodes. (A) Talin and kindlin-3 expression  
Figure 8 continued on next page

## Figure 8 continued

in FACS-sorted Pir<sup>+</sup> T cell progenitor cells from WT FL of E13.5 embryos compared to DN1 cells sorted from the thymus of P6 mice. GAPDH served as loading control. (B) Talin and kindlin-3 expression in control and kindlin-3<sup>-/-</sup> Pir<sup>+</sup> T cell progenitor cells isolated from E13.5 FL. GAPDH served as loading control. Mean blood flow velocities (C) and shear rates (D) within the yolk sac vasculature of E12.5 to E16.5 embryos were determined by intravital microscopy. N = 14/3/8/21/18. (E and F) Relative adhesion of Pir<sup>+</sup> T cell progenitor cells FACS-sorted from the FLs of control and *Fermt3*<sup>-/-</sup> E13.5 embryos on ICAM-1, P-selectin, CCL21 and CCL25 or on VCAM-1, P-selectin, CCL21 and CCL25 coated ibidi flow chambers with stepwise increasing shear rates. N ≥ 5. Bars indicate means ± standard deviation. (G) Purity of CD4<sup>+</sup> T cells from WT and *Fermt3* hypomorphic (n/-) mice that have been labelled with CFSE and Far Red and mixed in a 1:1 ratio. Grey line represents isotype control. (H,I) Adhesion of CD4<sup>+</sup> T cells in vivo. (H) Representative microscopic images of adherent (+/+, red) and (n/-, green) cells in the lymph node vasculature after adoptive transfer. Sum intensity Z projections of confocal stacks are shown. Segmented lines indicate vessel outlines. Scale bar = 50 μm. (I) Quantification of adherent CD4<sup>+</sup> T cells (N = 18–19 vessels from three mice). (J, K) Microvascular blood flow in the lymph node vasculature. (J) Centerline blood flow velocity and (K) vascular shear rate in LN microvessel segments (N = 25–27 field of views from three mice). Bars indicate means ± standard deviation. \*\*p<0.01; \*\*\*p<0.001. See also **Figure 8—figure supplements 1 and 2**.

DOI: <https://doi.org/10.7554/eLife.35816.015>



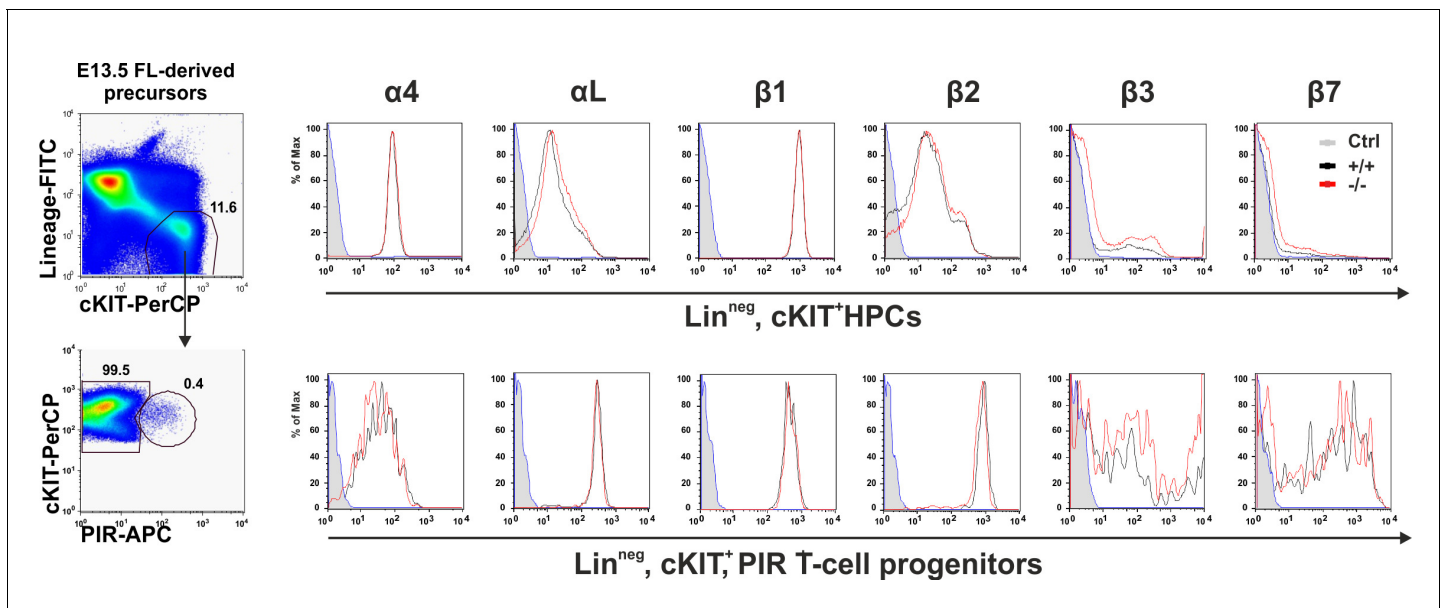

**Figure 8—figure supplement 1.** Kindlin-3 is important to stabilize the adhesion of T cell progenitors and mature T cells to vascular integrin ligands when blood flow velocities and shear rate levels increase during development and in vessel segments of higher blood flow within lymph nodes. Surface expression of integrins on HPCs ( $\text{Lin}^{\text{neg}}$ , c-kit $^+$ ) and T cell progenitors ( $\text{Lin}^{\text{neg}}$ , c-kit $^+$ , PIR $^+$ ). FL cells from E13.5 control and *Fermt3* $^{-/-}$  embryos were stained for lineage markers (B220, CD19, TER119, NK1.1, Gr-1 and Thy1.2), c-kit, PIR and one of the indicated integrins.

DOI: <https://doi.org/10.7554/eLife.35816.016>

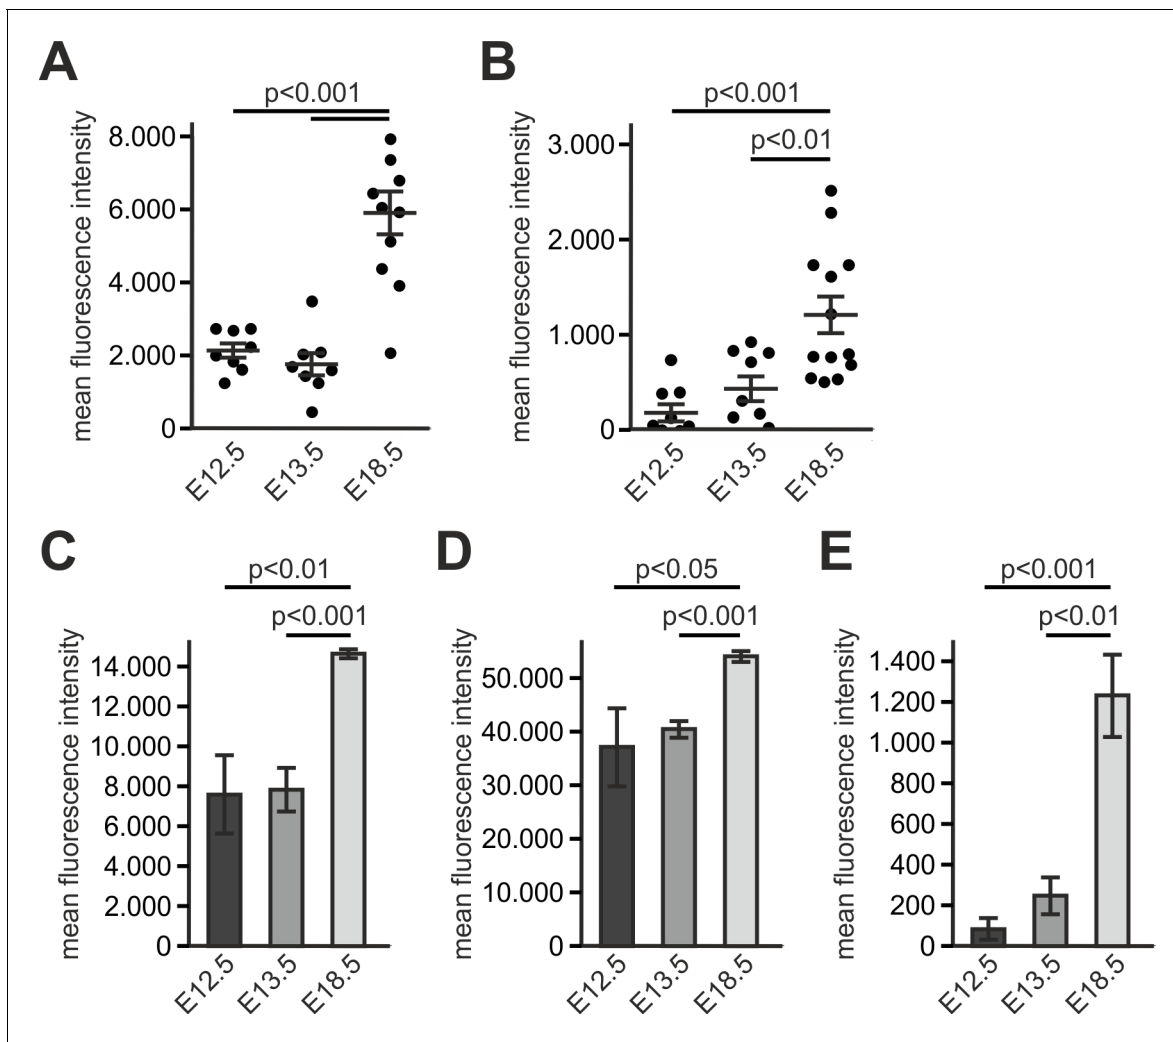

**Figure 8—figure supplement 2.** Kindlin-3 is important to stabilize the adhesion of T cell progenitors and mature T cells to vascular integrin ligands when blood flow velocities and shear rate levels increase during development and in vessel segments of higher blood flow within lymph nodes. ICAM-1 (A) and VCAM-1 (B) expression was quantified by measuring the fluorescence intensities of immunofluorescence stainings of CD31<sup>+</sup> pharyngeal vessels at E12.5 and E13.5 and intrathymic vessels at E18.5. N = 3. (C–E) Flow cytometric analysis of ICAM-1 (C), ICAM-2 (D) and VCAM-1 (E) expression of CD31<sup>+</sup> endothelial cells from the thymus/neck region of E12.5, E13.5 and E18.5 embryos. N = 3. Bars indicate means  $\pm$  standard deviation. Bars indicate means  $\pm$  standard deviation.

DOI: <https://doi.org/10.7554/eLife.35816.017>
